# Supplementary material
Source: PubMed Central journal article supplement (PMC3992929)
Supplement: NIHMS566889-supplement-Supplementary_figure_S1-S2.pdf [file NIHMS566889-supplement-Supplementary_figure_S1-S2.pdf]

## SUPPLEMENTARY ONLINE DATA

# Protein disulfide-isomerase interacts with soluble guanylyl cyclase via a redox-based mechanism and modulates its activity

Erin J. HECKLER<sup>1</sup>, Pierre-Antoine CRASSOUS, Padmamalini BASKARAN<sup>2</sup> and Annie BEUVE

Department of Pharmacology and Physiology, New Jersey Medical School, UMDNJ, Newark, NJ 07103, U.S.A.

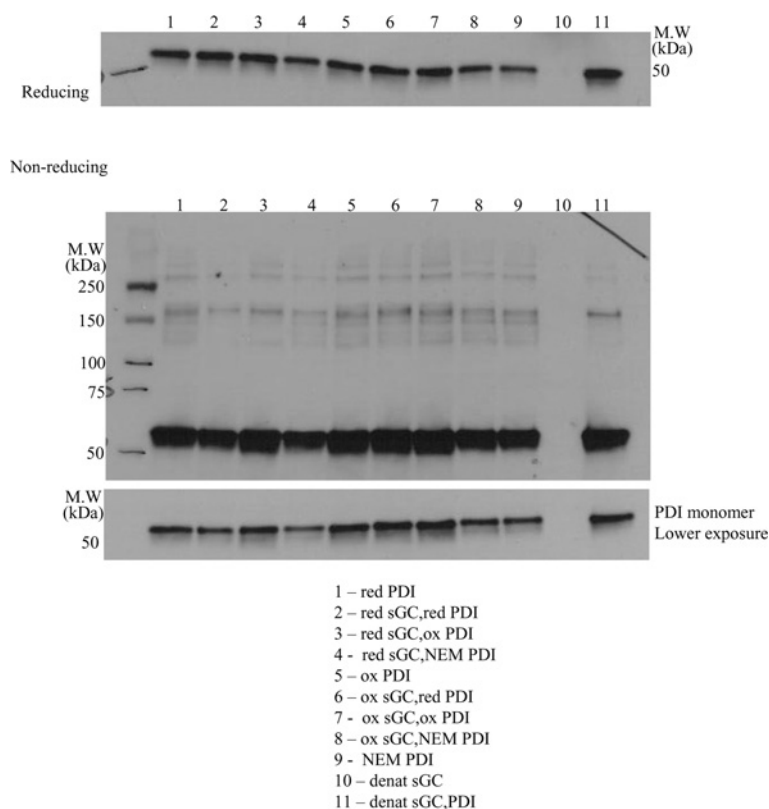

**Figure S1** Representative redox blots of reducing and non-reducing Western blots probed for PDI

Lanes numbered 1–11 are redox samples as labelled. denat, denatured; red, reduced; ox, oxidized.

<sup>1</sup> To whom correspondence should be addressed (email heckleer@umdnj.edu).

<sup>2</sup> Present address: College of Health Sciences, School of Pharmacy, University of Wyoming, Laramie, WY 82071, U.S.A.

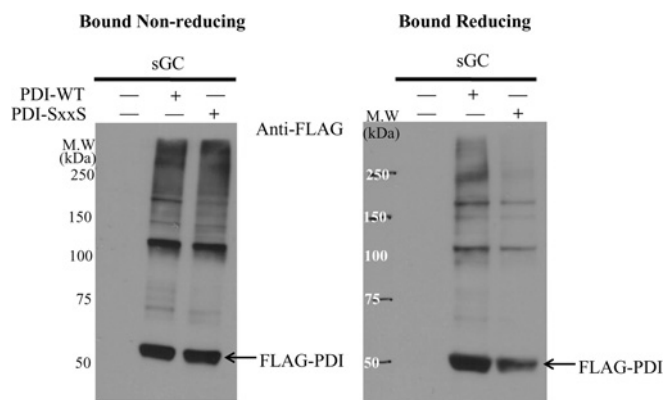

**Figure S2 FLAG IP blots**

Anti-FLAG antibodies detected a smear under non-reducing conditions, which was expected, as PDI interacts with many proteins.

Received 26 February 2013/11 March 2013; accepted 11 March 2013  
 Published as BJ Immediate Publication 11 March 2013, doi:10.1042/BJ20130298
